# Supplementary material for: Electrocatalytic sulfur electrodes for CdS/CdSe quantum dot-sensitized solar cells
Source: Royal Society of Chemistry journal article supplement (doi:10.1039/c0cc00642d), 2010-01-01
Supplement: c0cc00642d.pdf [file c0cc00642d.pdf]

## **Electrocatalytic Sulfur Electrodes for CdS/CdSe Quantum Dot–Sensitized Solar Cells**

Zusing Yang, Chia-Ying Chen, Chi-Wei Liu, and Huan-Tsung Chang\*

[\*] Dr. Z. Yang, Ms. C. -Y. Chen, Dr. C. -W. Liu and Prof. H. -T. Chang\*

Department of Chemistry, National Taiwan University, 1, Section 4, Roosevelt Road,  
Taipei 106, Taiwan

E-mail: [changht@ntu.edu.tw](mailto:changht@ntu.edu.tw)

## *Experimental*

*Chemicals and Instrumentation:* Commercially available P-25 TiO<sub>2</sub> powders (Degussa), cadmium nitrate, cobalt nitrate, selenium power, zinc sulfate, sodium sulfide, hydrogen hexachloroplatinate(IV), thioacetamide, ethylene glycol, 3-mercaptopropionic acid (3-MPA), potassium chloride, sodium hydroxide, poly(vinylpyrrolidone) (PVP,  $M_w$  55,000), polyethylene glycol ( $M_w$  5,000), methyl cellulose, sulfur, and methanol were purchased from Sigma–Aldrich (Milwaukee, WI).

*Preparation of TiO<sub>2</sub>-CdS/CdSe/ZnS Electrodes:* TiO<sub>2</sub> electrodes having an effective area of 0.2 cm<sup>2</sup> were immersed into a solution of Cd(NO<sub>3</sub>)<sub>2</sub> (0.5 M) for 5 min, rinsed with dd H<sub>2</sub>O, and dried with an air gun. They were then dipped for 5 min into 0.5 M aqueous Na<sub>2</sub>S, rinsed with dd H<sub>2</sub>O, and dried with an air gun. The process was repeated up to three cycles. These as-prepared electrodes are represented herein as “TiO<sub>2</sub>-(CdS)<sub>3</sub>” electrodes. The TiO<sub>2</sub>-(CdS)<sub>3</sub> electrodes were dipped into a solution of Cd<sup>2+</sup> (0.5 M) for 5 min at room temperature and then immersed into 0.08 M aqueous Na<sub>2</sub>SeSO<sub>3</sub> for 1 h at 50 °C, followed by rinsing with dd H<sub>2</sub>O and drying with an air gun. The process was repeated up to two cycles. These as-prepared electrodes are represented herein as “TiO<sub>2</sub>-(CdS)<sub>3</sub>-(CdSe)<sub>2</sub>” electrodes. The TiO<sub>2</sub>-(CdS)<sub>3</sub>-(CdSe)<sub>2</sub> electrodes were immersed into a solution of Zn(NO<sub>3</sub>)<sub>2</sub> (0.5 M) for 5 min, rinsed with

dd H<sub>2</sub>O, and dried with air gun. They were then dipped for 5 min into 0.5 M aqueous Na<sub>2</sub>S, followed by rinsing with dd H<sub>2</sub>O and drying with an air gun, to obtain TiO<sub>2</sub>-(CdS)<sub>3</sub>-(CdSe)<sub>2</sub>-ZnS electrodes.

*Preparation of MS (M = Co, Cu, Ni) Electrodes:* A cleaned FTO glass was dipped into 0.5 M Co<sup>2+</sup> (or Cu<sup>2+</sup> or Ni<sup>2+</sup>) for 30 s, rinsed with ethanol, and dried with an air gun. The sample was then dipped for 30 s into 0.5 M aqueous Na<sub>2</sub>S, followed by rinsing with ethanol and drying with an air gun. The process was repeated up to three cycles to obtain the CoS (or CuS or NiS) electrode.

*Preparation of Pt Electrodes:* A mixture of PVP (0.14 g), 0.01 M H<sub>2</sub>PtCl<sub>6</sub>·H<sub>2</sub>O, and ethylene glycol (50 ml) was heated at 160 °C for 2 h, during which time the color of the solution turned black, indicating the formation of Pt NPs. The as-prepared Pt NPs were subjected to three centrifugation/wash cycles (15,000 rpm, 10 min) and then they were stored in ethanol. Pt electrodes were prepared by placing a drop of the ethanol solution of these Pt NPs (5 nm) onto FTO glass substrates, drying them at 100 °C for 30 min, and then sintering them at 450 °C for 30 min prior to use.

*Fabrication of QDSSCs:* The QDSSC devices were obtained after assembling one of the as-prepared electrodes with a counter electrode and a U-like spacer in a sandwich configuration and then annealing at 100 °C for 30 min. The electrolyte was a

polysulfide solution: 2.0 M Na<sub>2</sub>S, 2.0 M S, and 0.2 M KCl in methanol/water (7:3, v/v).

*Measurements.* Reflection absorption spectra of the as-prepared electrodes were recorded using a Cary 100 UV–Vis spectrophotometer from Varian (Palo Alto, CA). Scanning electron microscopy (SEM) images were recorded using an S-2400 SEM system from Hitachi (Tokyo, Japan). Potentiostatic current–voltage ( $I$ – $V$ ) curves were recorded using a CHI 660A electrochemical analyzer (CH Instruments, Austin, TX). A CHI 614D electrochemical impedance spectrometer (CH Instruments, Austin, TX) was employed to determine the charge-transfer resistance between the electrode and the electrolyte at zero bias potential over the frequency range of 0.1–100 KHz. The irradiation source for determining the photocurrent density–voltage ( $J$ – $V$ ) characteristics was a 450-W xenon arc lamp (Oriel, Stratford, CT) equipped with an AM 1.5 filter. A Keithley 2400 digital source meter (Test Equipment Connection, Lake Mary, FL) was used to record the  $J$ – $V$  curves of the as-prepared QDSSCs. A metal mask with an area of 0.16 cm<sup>2</sup> covering the QDSSCs was used to ensure the effective area of the QDSSCs. A commercial available silicon based reference cell (Oriel, Stratford, CT) was employed to check the light intensity (100 mA/cm<sup>2</sup>). All of the  $J$ – $V$  measurements were recorded after at least 10 reproducible cycles to ensure

no change in  $J-V$  curves. The IPCE spectra were recorded using a PEC-S20 instrument (Peccell Technologies, Inc., Kanagawa, Japan).

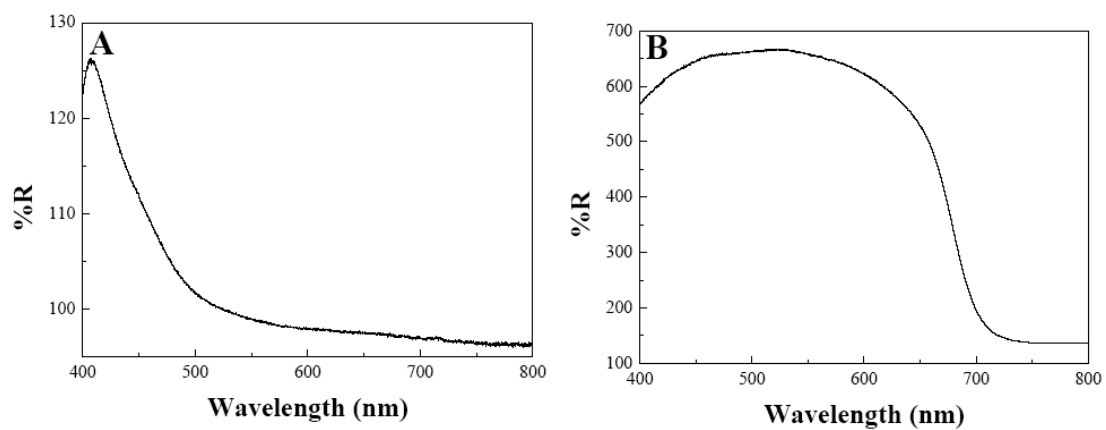

**Figure S1.** Reflection spectra of (A) TiO<sub>2</sub>/CdS and (B) TiO<sub>2</sub>/CdSe electrodes.

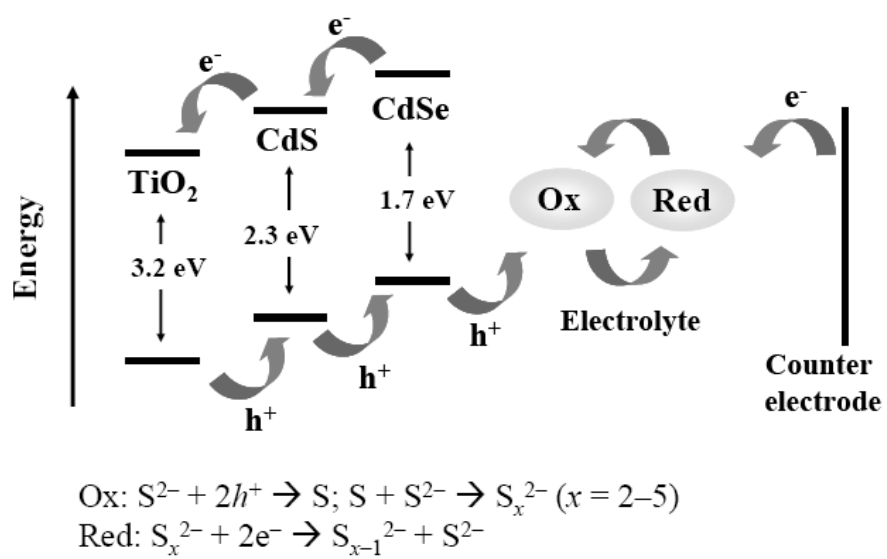

**Figure S2.** The energy level diagram of the components in QDSSCs devices.

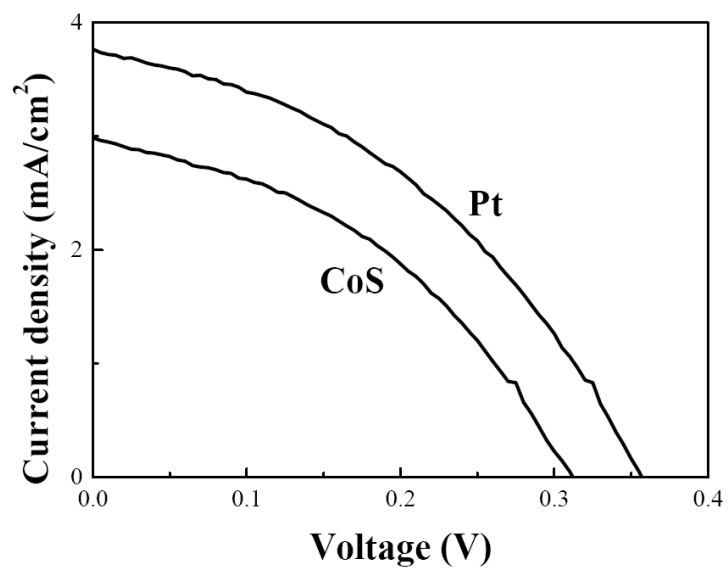

**Figure S3.**  $J$ - $V$  curves of QDSSCs featuring CoS and Pt as electrodes. Polysulfide electrolyte: 0.5 M Na<sub>2</sub>S, 2.0 M S, and 0.2 M KCl in methanol/water (7:3, v/v).



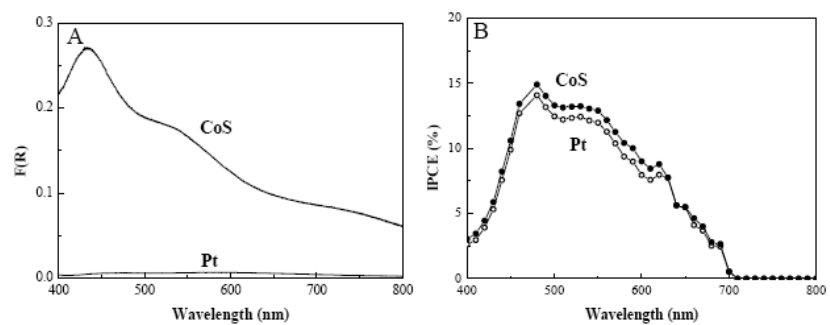

**Figure S4.** (A) Reflection spectra of Pt and CoS electrodes. (B) IPCE spectra of QDSSCs featuring CoS or Pt as the counter electrode.

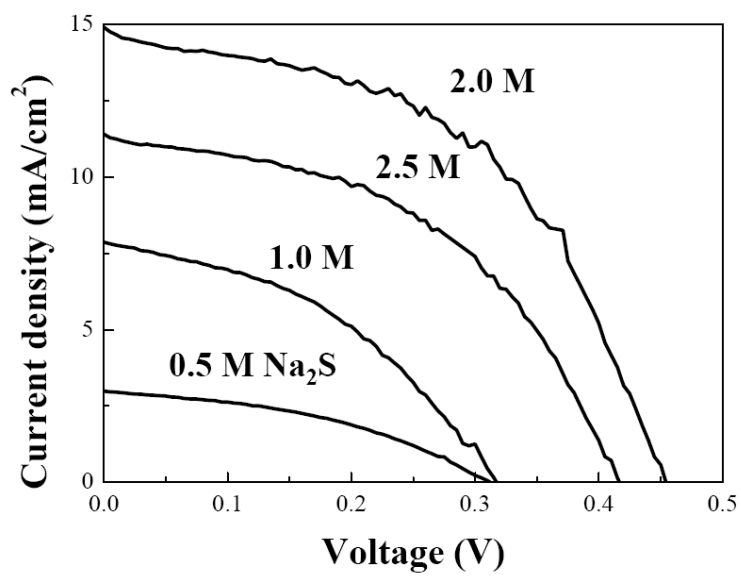

**Figure S5.**  $J$ - $V$  curves of QDSSCs featuring electrolytes comprising Na<sub>2</sub>S (0.5–2.5 M), 2.0 M S, and 0.2 M KCl in methanol/water (7:3, v/v).

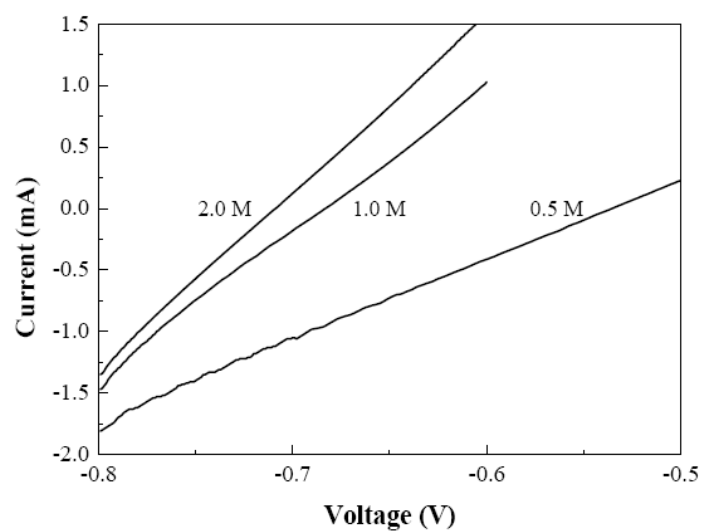

**Figure S6.** Potentiostatic  $I$ - $V$  plots of a CoS electrode in the presence of electrolytes comprising  $\text{Na}_2\text{S}$  (0.5–2.0 M), 2.0 M S, and 0.2 M KCl in methanol/water (7:3, v/v).

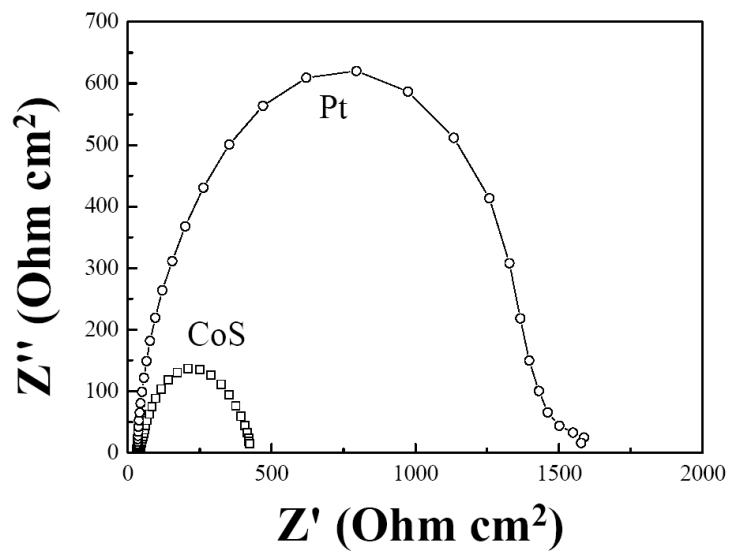

**Figure S7.** Impedance spectra of CoS and Pt electrodes.

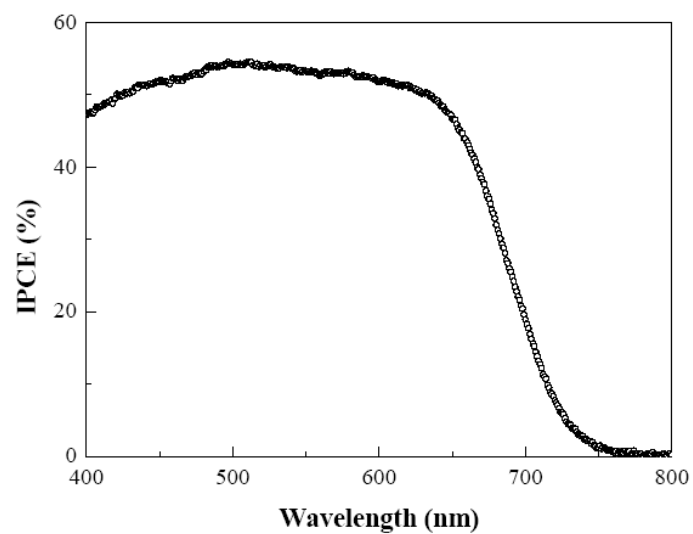

**Figure S8.** IPCE spectrum of a CdS/CdSe QDSSC featuring a CoS electrode. Polysulfide electrolyte: 2.0 M Na<sub>2</sub>S, 2.0 M S, and 0.2 M KCl in methanol/water (7:3, v/v).

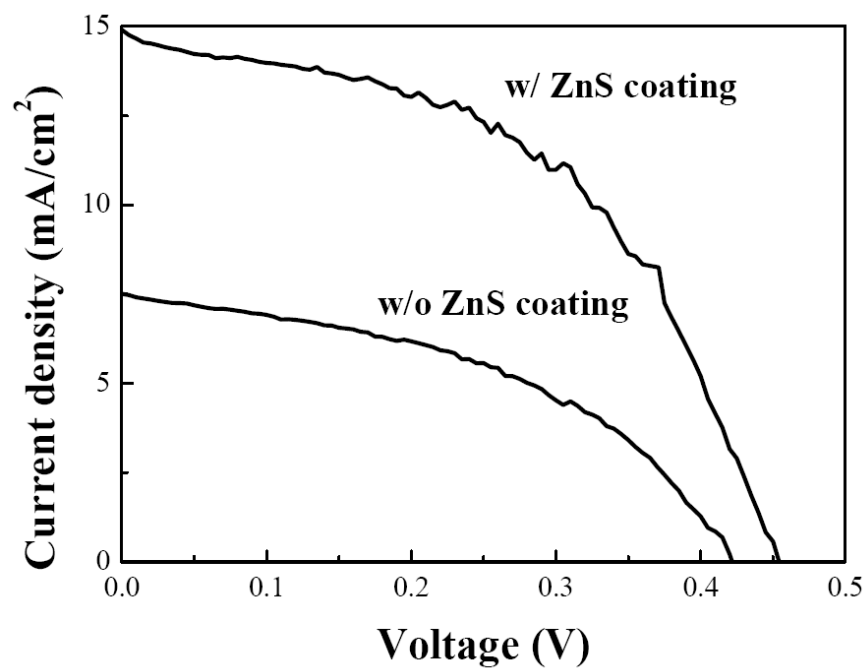

**Figure S9.**  $J$ - $V$  curves of QDSSCs with and without ZnS coating.

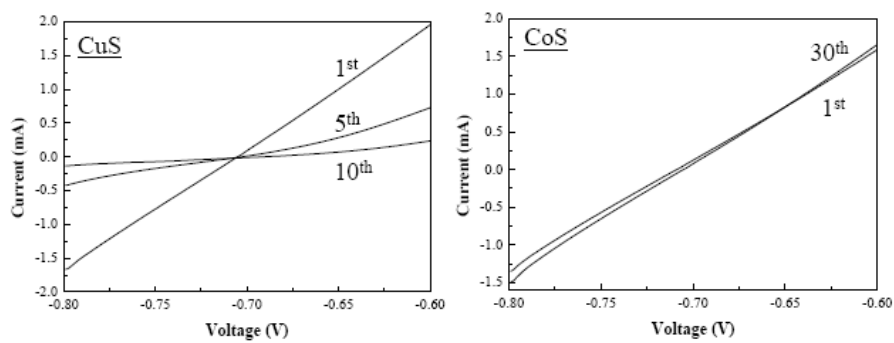

**Figure S10.** Potentiostatic  $I-V$  curves of (A) CuS and (B) CoS electrodes after several scan cycles. Polysulfide electrolyte: 2.0 M  $\text{Na}_2\text{S}$ , 2.0 M S, and 0.2 M KCl in methanol/water (7:3, v/v).
